# Supplementary material for: Elderly-Onset Paroxysmal Kinesigenic Dyskinesia: A Case Report
Source: Springer Nature journal article supplement (doi:10.1007/s40120-022-00405-0), 2022-09-17
Supplement: MOESM1 [file 23507778]

# **Elderly-onset paroxysmal kinesigenic dyskinesia: a case report**

**Lulu Yao<sup>1</sup>, Wei Liang<sup>1</sup>, Shanshan Mei<sup>2,3</sup>, Erhe Xu<sup>2,3</sup>, Xiaobo Huang<sup>1\*</sup>**

<sup>1</sup>Department of Traditional Chinese Medicine, Xuanwu Hospital, Capital Medical University, Beijing, China.

<sup>2</sup>Department of Neurology, Xuanwu Hospital, Capital Medical University, Beijing, China.

<sup>3</sup>National Clinical Research Center for Geriatric Disorders, Beijing, China

**\* Correspondence:**

Xiaobo Huang

Department of Traditional Chinese Medicine, Xuanwu Hospital, Capital Medical University

No.45 Changchun Street, Xicheng District

Beijing 100053, China

Tel: 83198327

Email: [huangxiaobo@xwh.ccmu.edu.cn](mailto:huangxiaobo@xwh.ccmu.edu.cn)

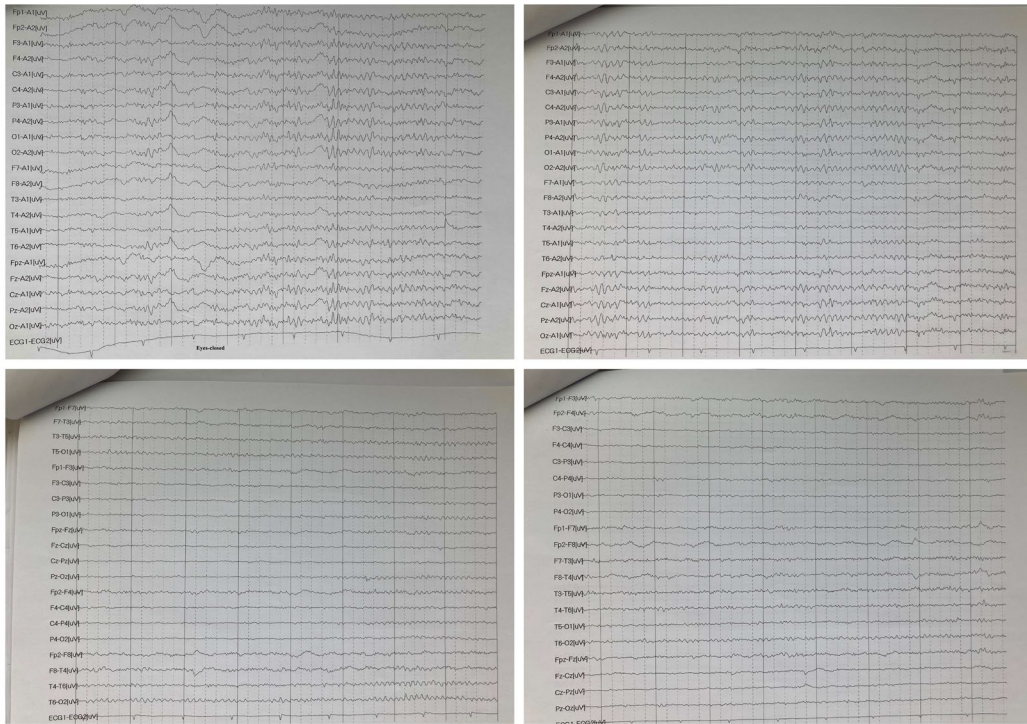

**Supplementary Fig. 1** No abnormality was found in the continuous video-EEG monitoring. In eyes-closed condition, occipital alpha rhythms were recorded in background EEG activity.

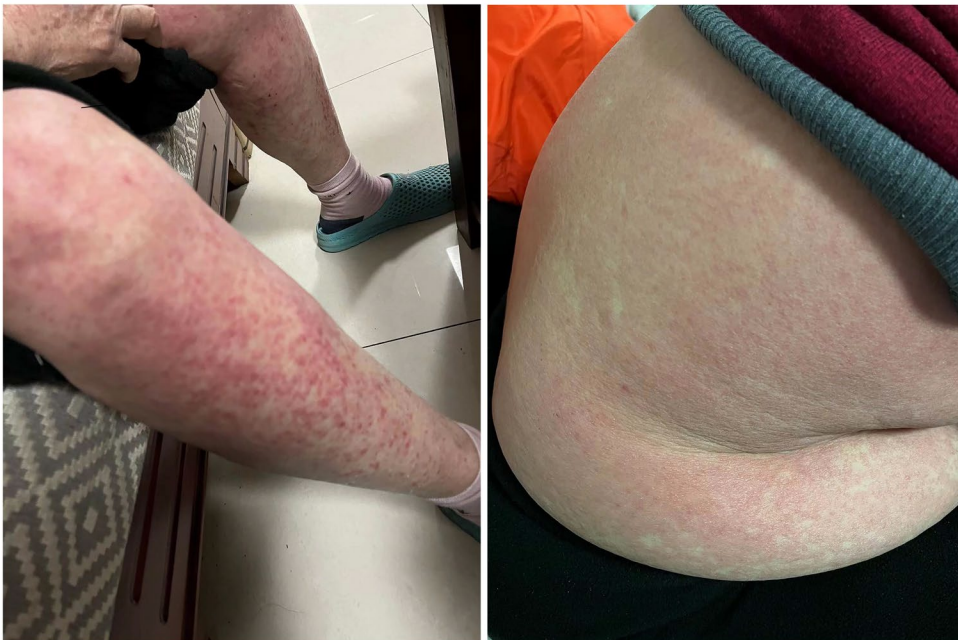

**Supplementary Fig. 2** The drug eruptions and pruritic red macules were distributed to the patient's trunk and extremities.

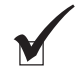

| Topic                               | Item | Checklist item description                                                                                   | Reported on Line                                                    |
|-------------------------------------|------|--------------------------------------------------------------------------------------------------------------|---------------------------------------------------------------------|
| <b>Title</b>                        | 1    | The diagnosis or intervention of primary focus followed by the words “case report” .....                     | Line 1                                                              |
| <b>Key Words</b>                    | 2    | 2 to 5 key words that identify diagnoses or interventions in this case report, including "case report" ..... | Lines 33-34                                                         |
| <b>Abstract<br/>(no references)</b> | 3a   | Introduction: What is unique about this case and what does it add to the scientific literature? .....        | Lines 29-32                                                         |
|                                     | 3b   | Main symptoms and/or important clinical findings .....                                                       | Lines 29-32                                                         |
|                                     | 3c   | The main diagnoses, therapeutic interventions, and outcomes .....                                            | Lines 25-27                                                         |
|                                     | 3d   | Conclusion—What is the main “take-away” lesson(s) from this case? .....                                      | Lines 30-32                                                         |
| <b>Introduction</b>                 | 4    | One or two paragraphs summarizing why this case is unique ( <b>may include references</b> ) .....            | Lines 58-60                                                         |
| <b>Patient Information</b>          | 5a   | De-identified patient specific information .....                                                             | Line 62                                                             |
|                                     | 5b   | Primary concerns and symptoms of the patient .....                                                           | Lines 63-69                                                         |
|                                     | 5c   | Medical, family, and psycho-social history including relevant genetic information .....                      | Lines 78-82                                                         |
|                                     | 5d   | Relevant past interventions with outcomes .....                                                              | Lines 71-77                                                         |
| <b>Clinical Findings</b>            | 6    | Describe significant physical examination (PE) and important clinical findings .....                         | Lines 83-86                                                         |
| <b>Timeline</b>                     | 7    | Historical and current information from this episode of care organized as a timeline .....                   | NA                                                                  |
| <b>Diagnostic Assessment</b>        | 8a   | Diagnostic testing (such as PE, laboratory testing, imaging, surveys). .....                                 | Lines 86-97                                                         |
|                                     | 8b   | Diagnostic challenges (such as access to testing, financial, or cultural) .....                              | Lines 96-97                                                         |
|                                     | 8c   | Diagnosis (including other diagnoses considered) .....                                                       | Lines 98-99                                                         |
|                                     | 8d   | Prognosis (such as staging in oncology) where applicable .....                                               | NA                                                                  |
| <b>Therapeutic Intervention</b>     | 9a   | Types of therapeutic intervention (such as pharmacologic, surgical, preventive, self-care) .....             | Lines 99-100                                                        |
|                                     | 9b   | Administration of therapeutic intervention (such as dosage, strength, duration) .....                        | Lines 99-100                                                        |
|                                     | 9c   | Changes in therapeutic intervention (with rationale) .....                                                   | Lines 102-103                                                       |
| <b>Follow-up and Outcomes</b>       | 10a  | Clinician and patient-assessed outcomes (if available) .....                                                 | Lines 103-106                                                       |
|                                     | 10b  | Important follow-up diagnostic and other test results .....                                                  | Lines 103-106                                                       |
|                                     | 10c  | Intervention adherence and tolerability (How was this assessed?) .....                                       | Lines 103-104                                                       |
|                                     | 10d  | Adverse and unanticipated events .....                                                                       | Lines 100-102                                                       |
| <b>Discussion</b>                   | 11a  | A scientific discussion of the strengths AND limitations associated with this case report .....              | Lines 179-181                                                       |
|                                     | 11b  | Discussion of the relevant medical literature <b>with references</b> .....                                   | Lines 111-178                                                       |
|                                     | 11c  | The scientific rationale for any conclusions (including assessment of possible causes) .....                 | Lines 181-184                                                       |
|                                     | 11d  | The primary “take-away” lessons of this case report (without references) in a one paragraph conclusion ..... | Lines 179-187                                                       |
| <b>Patient Perspective</b>          | 12   | The patient should share their perspective in one to two paragraphs on the treatment(s) they received .....  | NA                                                                  |
| <b>Informed Consent</b>             | 13   | Did the patient give informed consent? Please provide if requested .....                                     | Yes <input checked="" type="checkbox"/> No <input type="checkbox"/> |
